# Supplementary material for: OsCSLD1 Mediates NH4+-Dependent Root Hair Growth Suppression and AMT1;2 Expression in Rice (Oryza sativa L.)
Source: MDPI journal article supplement (doi:10.3390/plants11243580), 2022-12-19
Supplement: s1 [file s1]

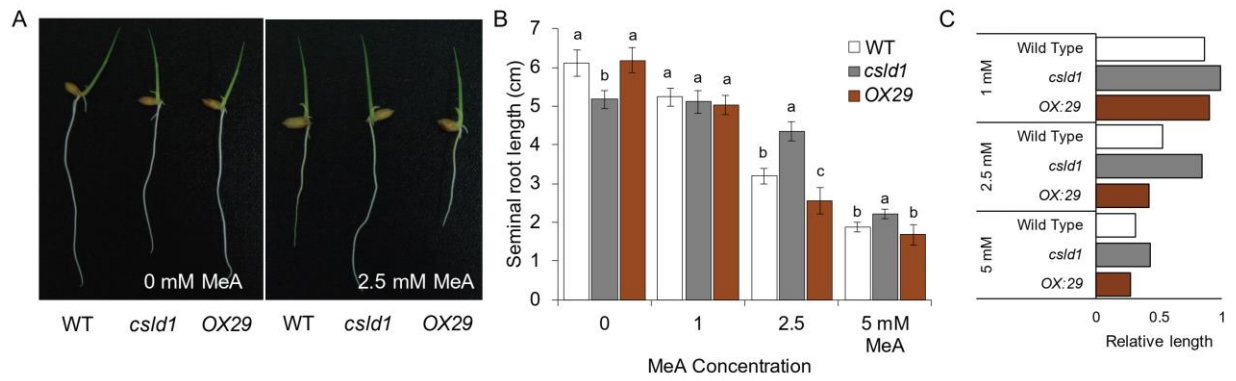

**Supplementary Figure S1.** *CSLD1:OX* lines are sensitive to Methylammonium (MeA). (a) Wild-type, *csld1* and *CSLD1:OX* seedlings grown in MeA free and 2.5 mM MeA treated seminal root lengths. (b) WT, *csld1* and *CSLD1:OX* seminal root lengths in 0 to 5 mM MeA. (c) Relative lengths of MeA treated seminal roots compared to non-treated root lengths. Scale bars = 1cm. line graph show mean values  $\pm$  standard error of means ( $n=10$ ).

**Supplementary Table S1.** Primers list used for qRT-PCR to quantify transcripts of *AMT1s*, and *OsCSLDs* transcript levels.

| Primer           | Sequence                 |
|------------------|--------------------------|
| <i>UBQ1_F</i>    | AACCAGCTGAGGCCCAAGA      |
| <i>UBQ1_R</i>    | ACGATTGATTTAACCAGTCCATGA |
| <i>AMT1:1_F</i>  | AGTACGTCGAGGAGATCTAC     |
| <i>AMT1:1_R</i>  | ACGTCGTTTCGTTCTGGATTG    |
| <i>AMT1:2_F</i>  | TAGACATGGCCTCCCATCTC     |
| <i>AMT1:2_R</i>  | TAAGCATGATGTTTCATGGTG    |
| <i>AMT1:3_F</i>  | AGGAGTACGTCGAGCTGATC     |
| <i>AMT1:3_R</i>  | CTTGCTCCGGCGACTTTCTG     |
| <i>OsCSLD1_F</i> | GGAGCTAGGTGTTTCGATCATG   |
| <i>OsCSLD1_R</i> | AGTAGCTGATGAATCGCCCCGAG  |
| <i>OsCSLD2_F</i> | GATCAGAAAGTGAGGCGATCG    |
| <i>OsCSLD2_R</i> | GAGTAGGACATGCGCGAGAG     |
| <i>OsCSLD3_F</i> | ATGCACGAGCACGAGAGATC     |
| <i>OsCSLD3_R</i> | AGCGTCTGCTTCTTGCAGAG     |
| <i>OsCSLD4_F</i> | GCTCACATGAAGGAGTGCTTG    |
| <i>OsCSLD4_R</i> | CAAACAATCGCTTAATCACACC   |
